# Supplementary material for: Analysis of Genetic Alteration Signatures and Prognostic Values of m6A Regulatory Genes in Head and Neck Squamous Cell Carcinoma
Source: PubMed Central journal article supplement (PMC7273190; doi:10.3389/fonc.2020.00718), 2020-05-29

Variant Classification

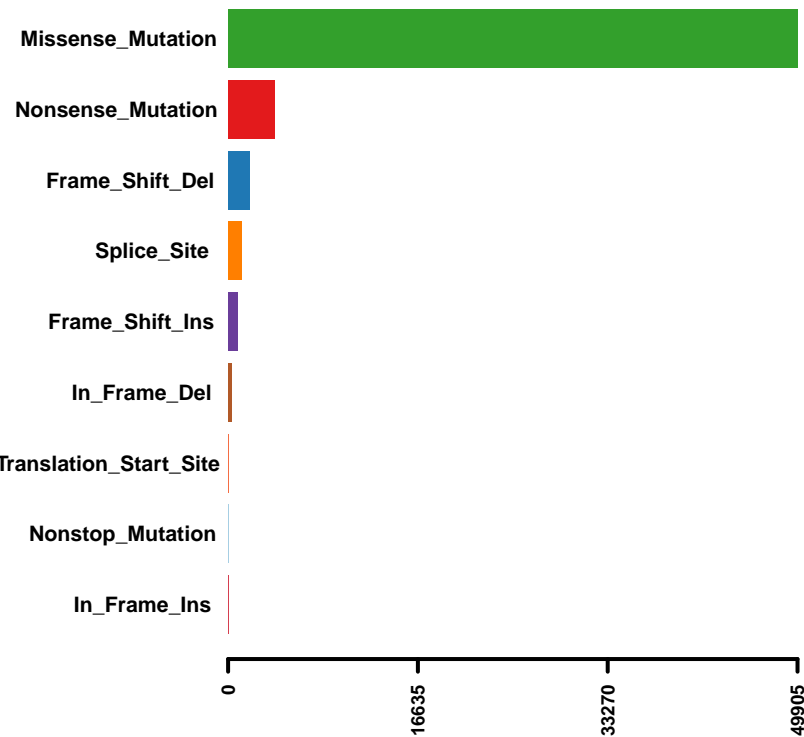

Variant Type

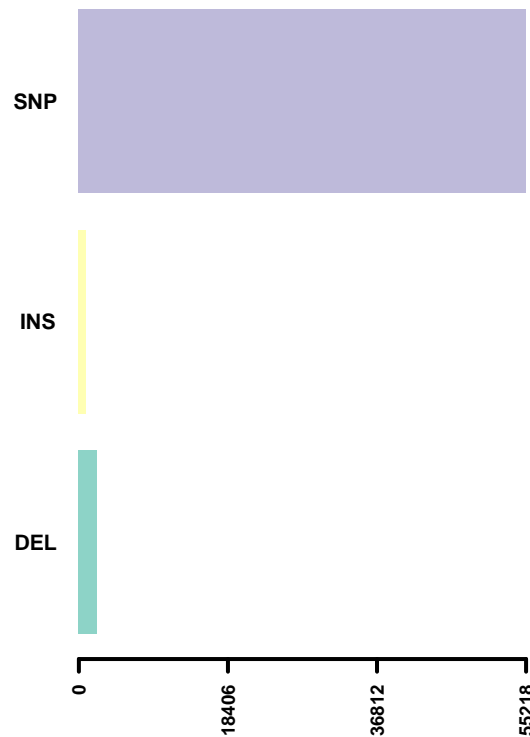

SNV Class

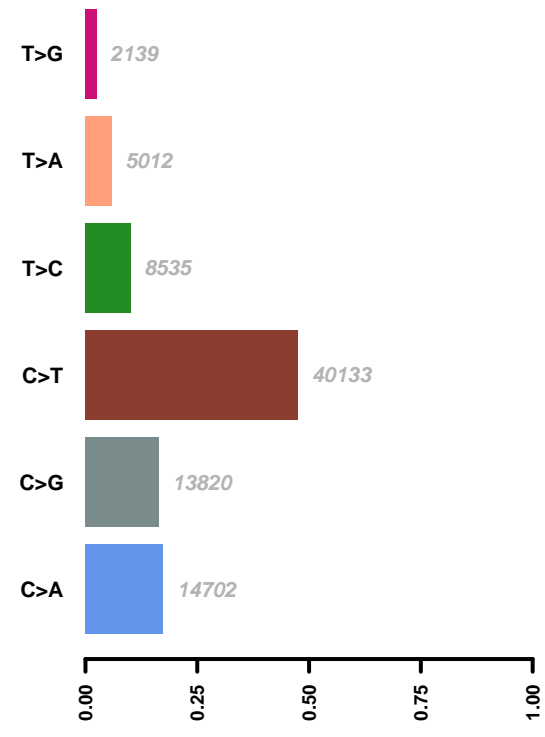Variants per sample  
Median: 78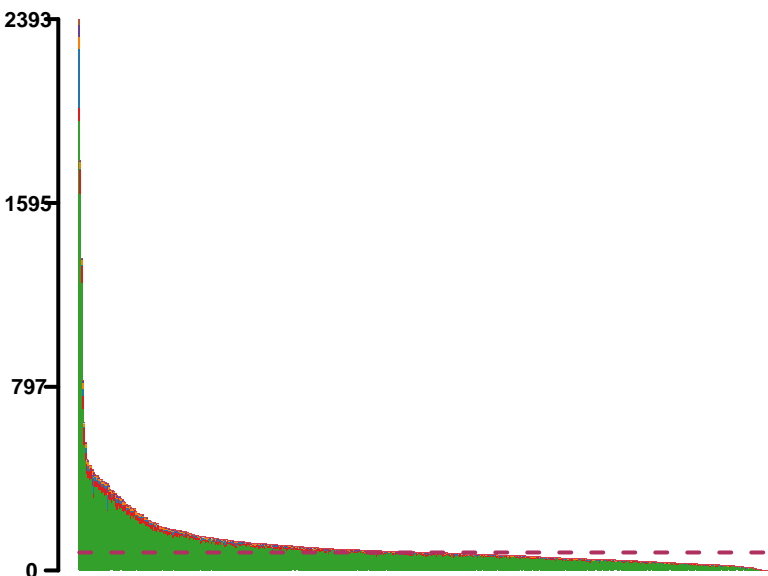Variant Classification  
summary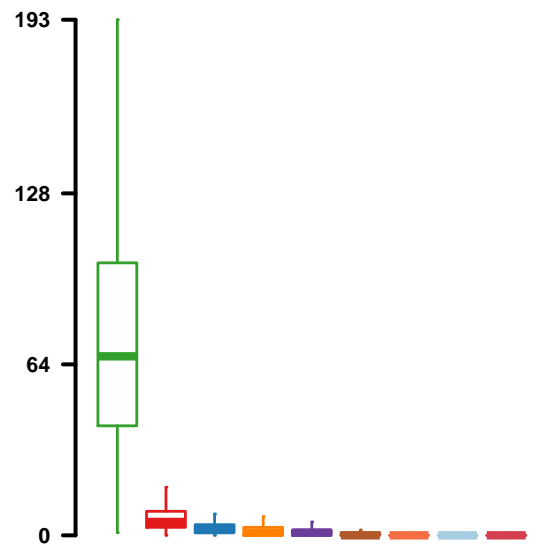Top 10  
mutated genes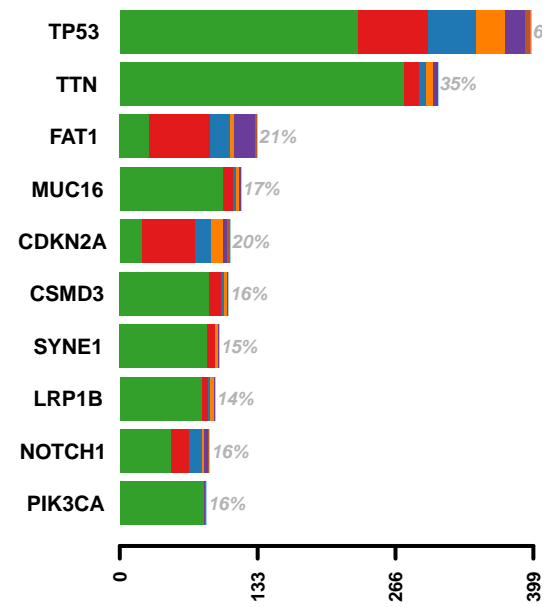

Supplement: Image_1.pdf [file Image_1.pdf]
