# Supplementary material for: Analysis of Genetic Alteration Signatures and Prognostic Values of m6A Regulatory Genes in Head and Neck Squamous Cell Carcinoma
Source: PubMed Central journal article supplement (PMC7273190; doi:10.3389/fonc.2020.00718), 2020-05-29

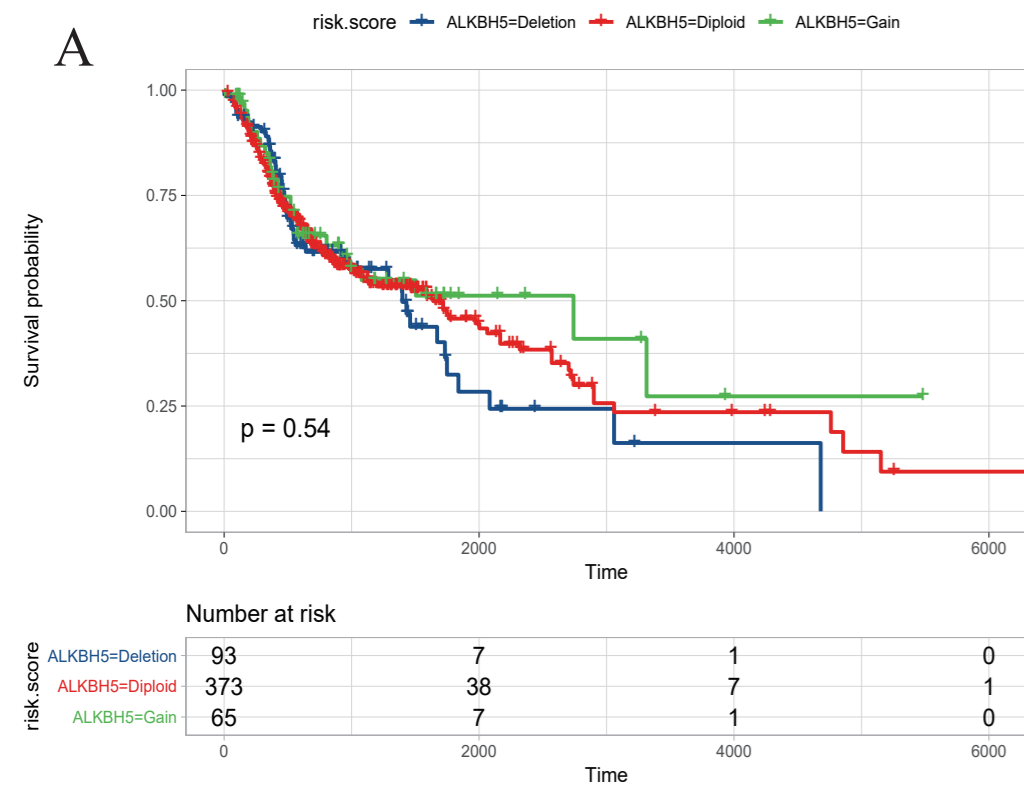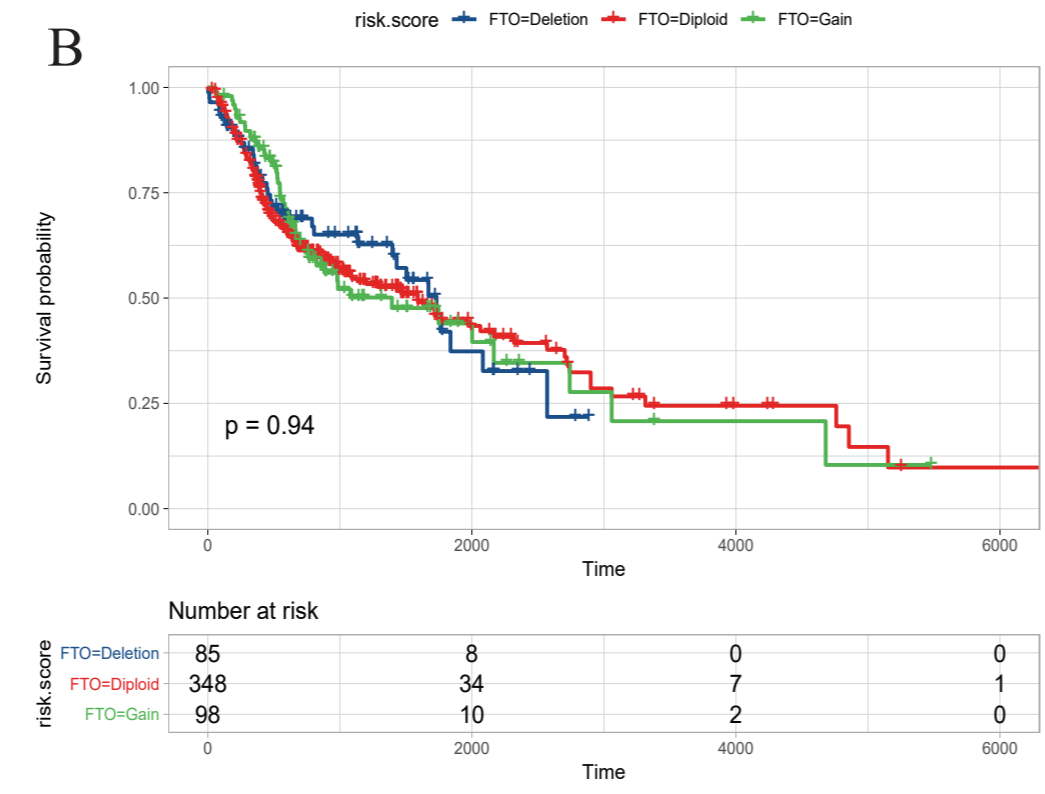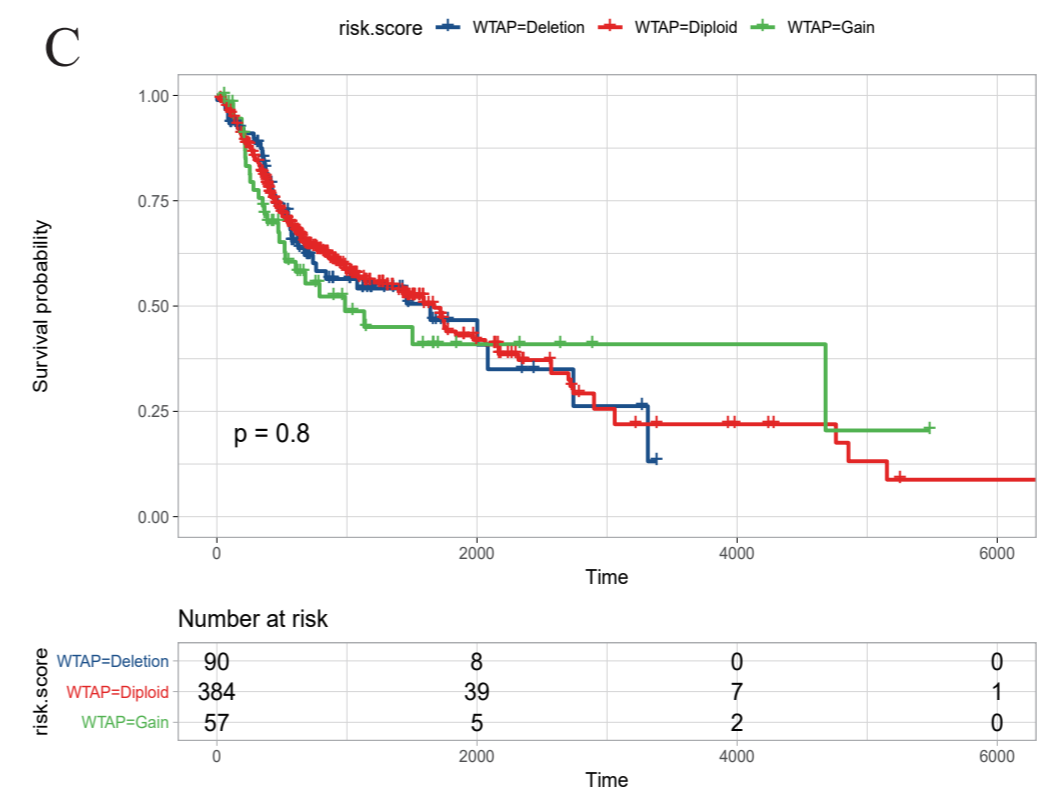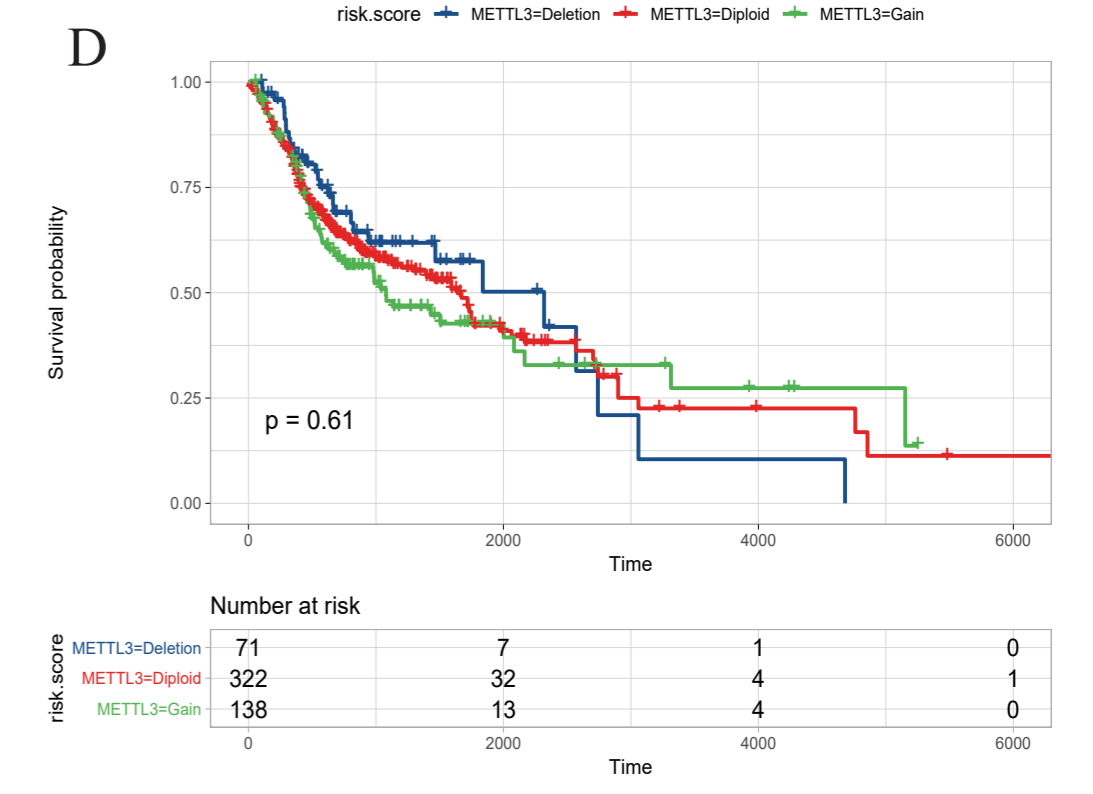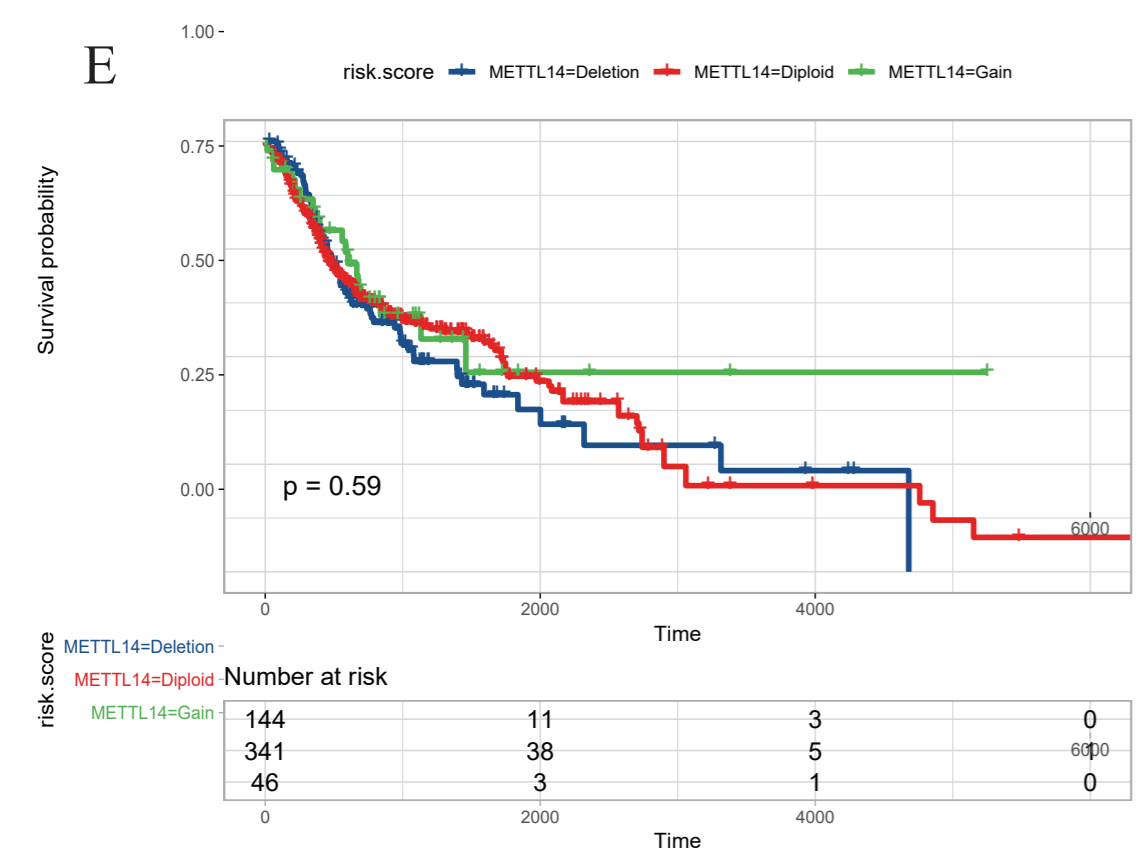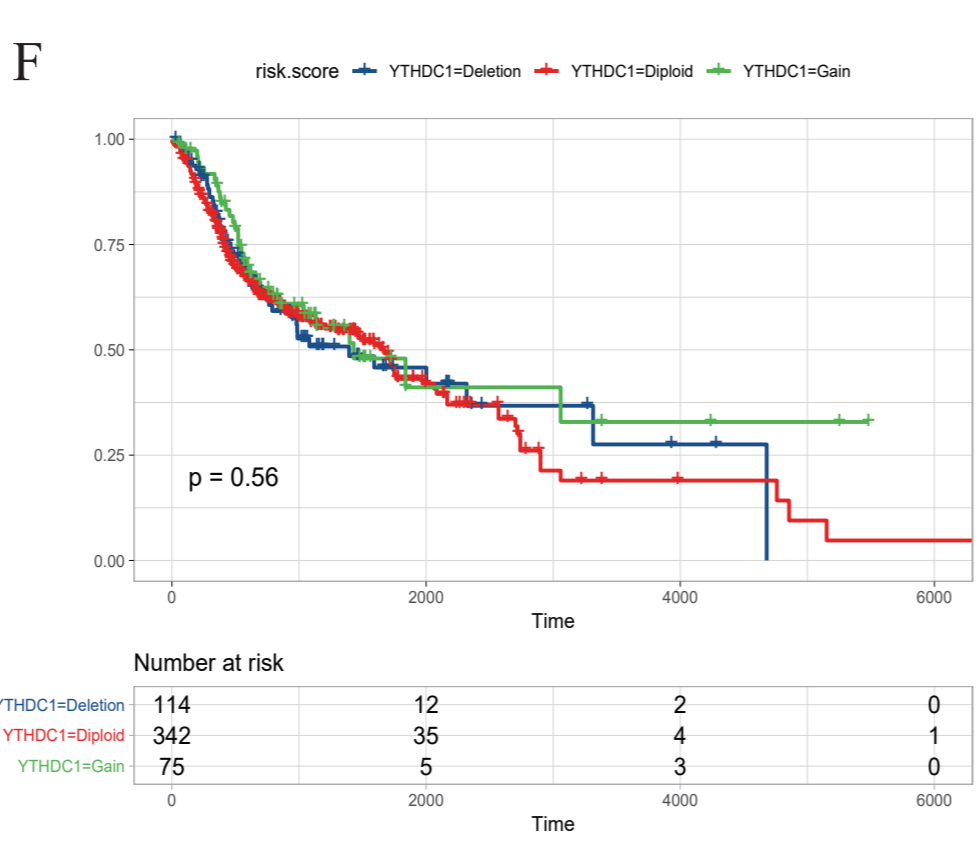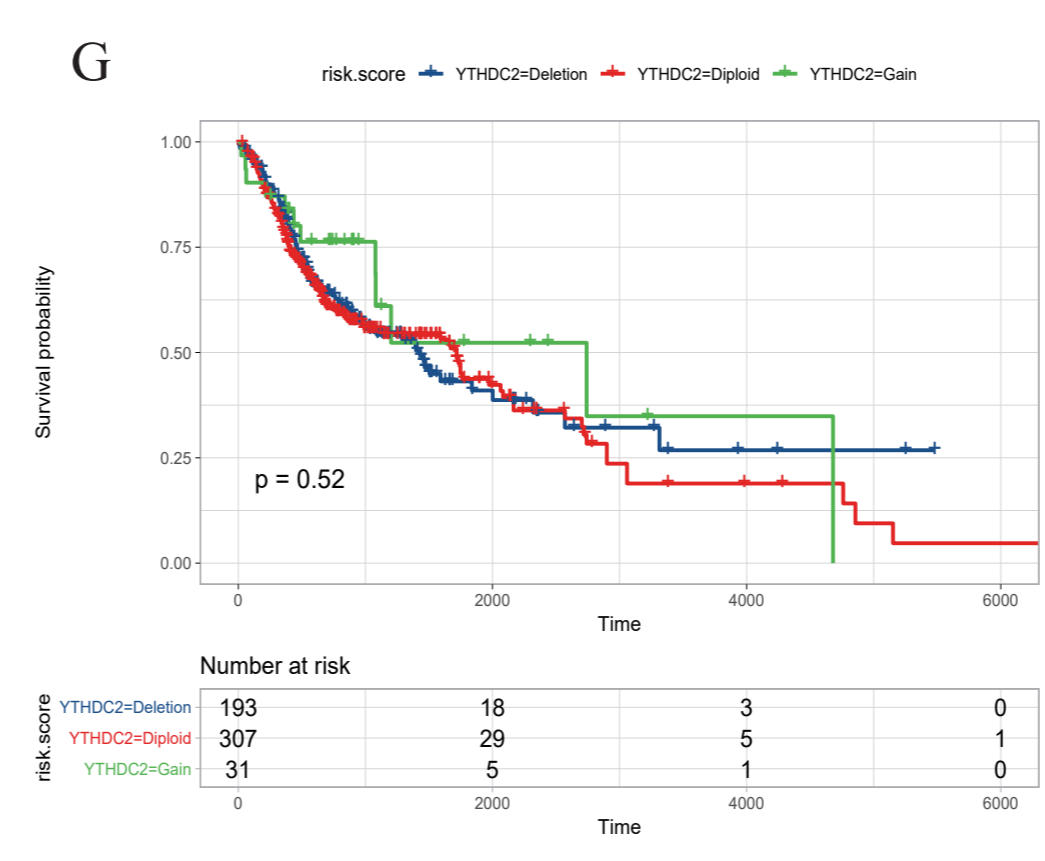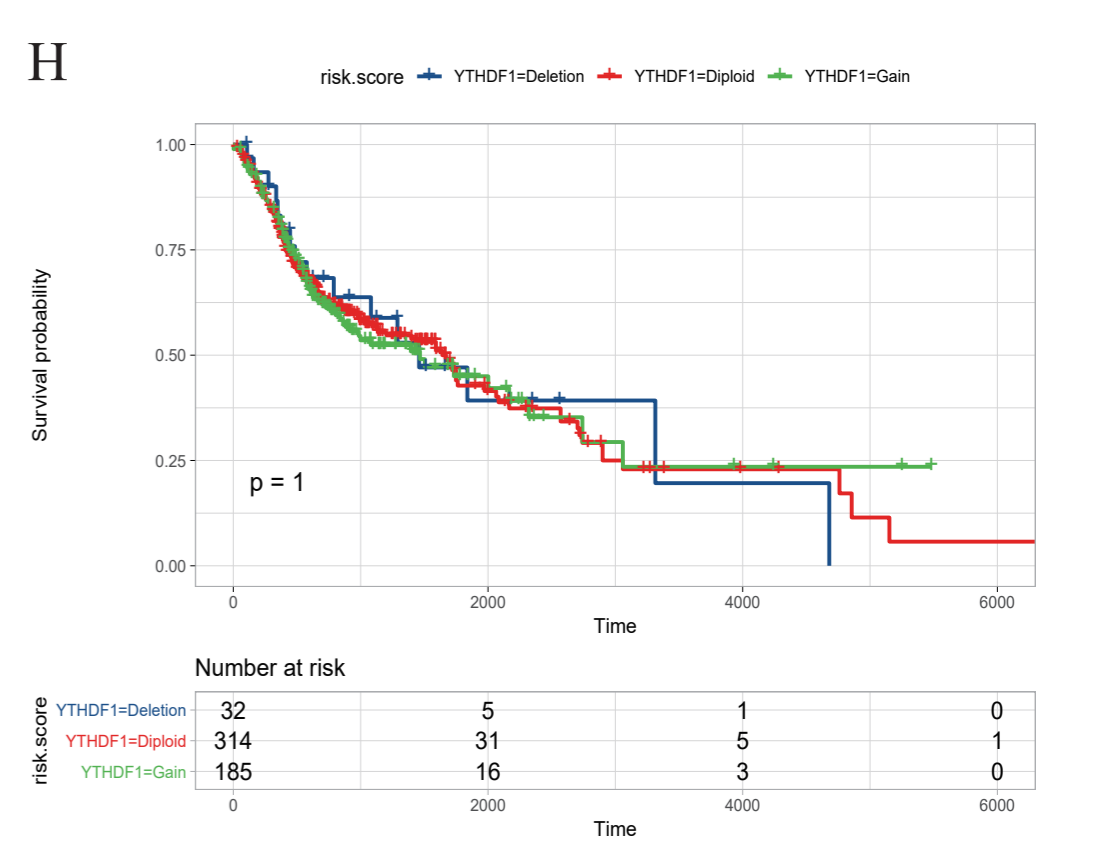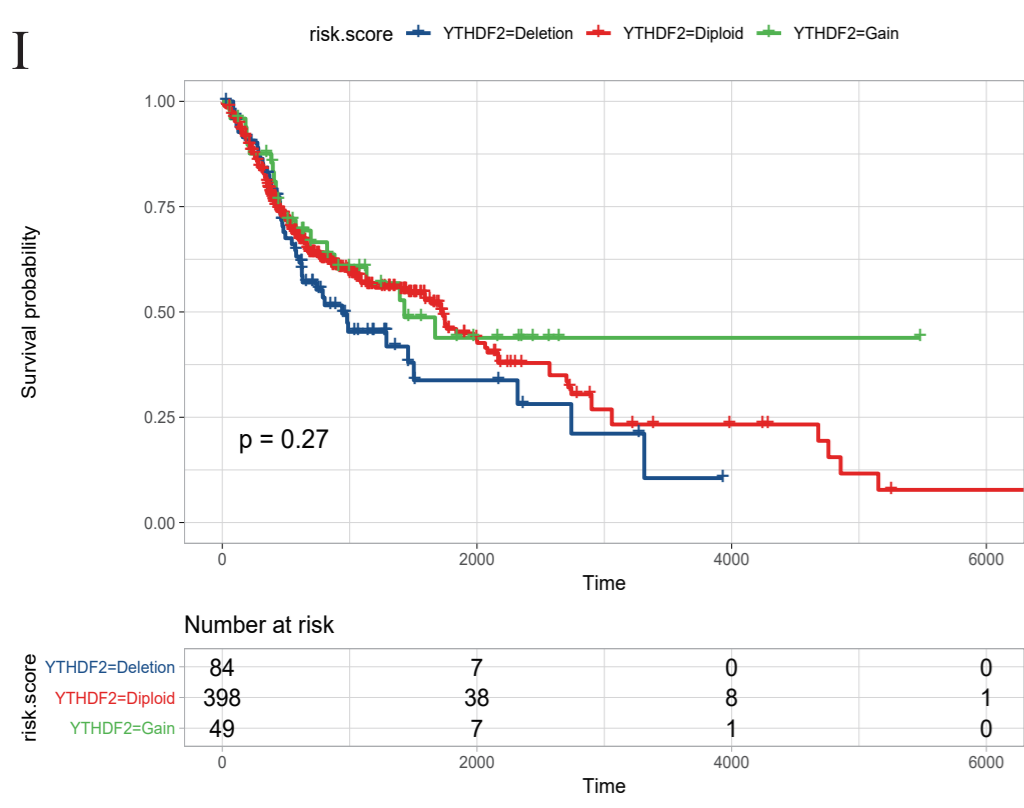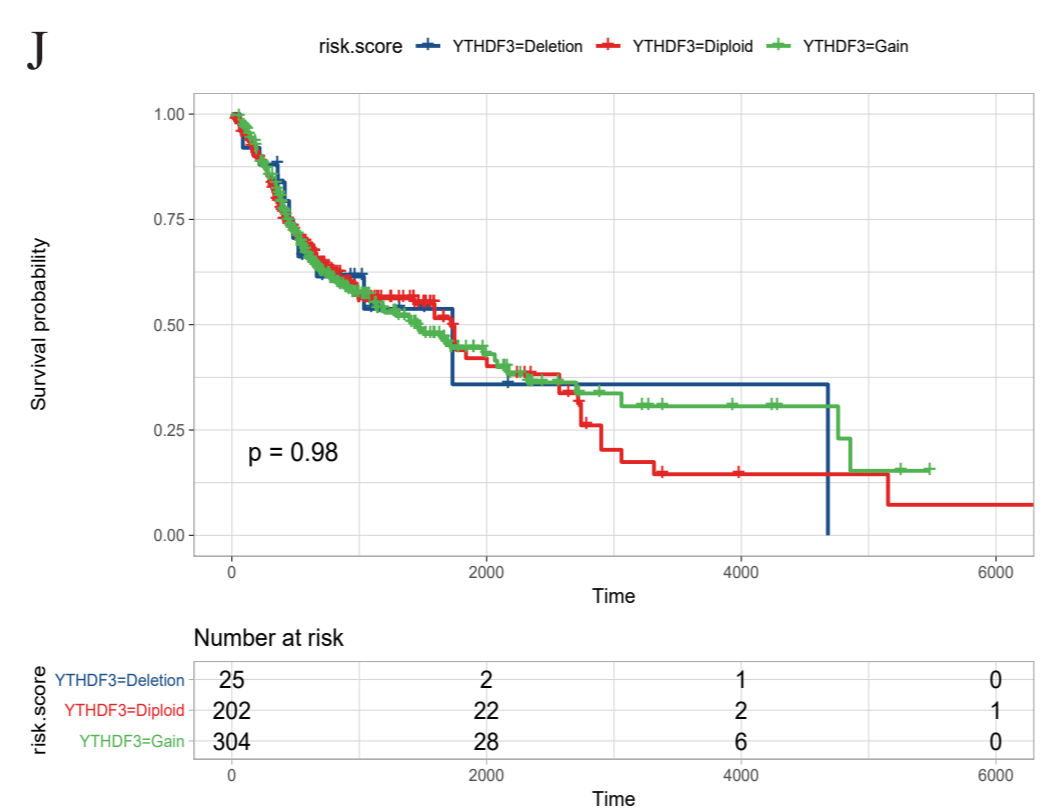

Supplement: Image_2.pdf [file Image_2.pdf]
